# Supplementary material
Source: PubMed Central journal article supplement (PMC2819422)
Supplement: NIHMS59245-supplement-01.pdf [file NIHMS59245-supplement-01.pdf]

## Supplemental Data

## Article

## A Molecule Targeting VHL-Deficient

## Renal Cell Carcinoma that Induces Autophagy

Sandra Turcotte, Denise A. Chan, Patrick D. Sutphin, Michael P. Hay, William A. Denny, and Amato J. Giaccia

Table S1. Analog Library

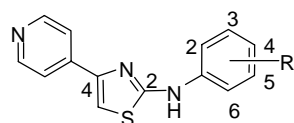

Scheme 1

| Name      | R                                                   | IC <sub>50</sub> (μM) |          | Ratio |
|-----------|-----------------------------------------------------|-----------------------|----------|-------|
|           |                                                     | RCC4                  | RCC4/VHL |       |
| STF-62247 | 3-Me                                                | 0.625                 | 16       | 25.6  |
| 30602     | H                                                   | 7.5                   | ND       | ND    |
| 30603     | 4-Me                                                | 2.5                   | 50       | 20    |
| 30644     | 4-OMe                                               | 15.5                  | 40       | 2.58  |
| 30651     | 3-OMe                                               | 3                     | ND       | ND    |
| 30654     | 3-Cl                                                | 3                     | 15       | 5     |
| 30670     | 3-CF <sub>3</sub>                                   | ND                    | ND       | ND    |
| 30671     | 4-Cl                                                | 38                    | ND       | ND    |
| 30709     | 4-F                                                 | 5                     | ND       | ND    |
| 30713     | 3,4-diCl                                            | 13.5                  | ND       | ND    |
| 31181     | 3,4-diOMe                                           | 20                    | 40       | 2     |
| 31184     | 4-OH                                                | 5.5                   | 80       | 14.54 |
| 31185     | 3-OH                                                | 20                    | ND       | ND    |
| 31186     | 3,4-OCH <sub>2</sub> O                              | ND                    | ND       | ND    |
| 31187     | 3,4-(CH <sub>2</sub> ) <sub>3</sub> -               | 1.75                  | 20       | 11.43 |
| 31258     | 3-OH, 4-Me                                          | 12                    | 56       | 4.67  |
| 31270     | 3-Me, 4-OH                                          | 70                    | 160      | 2.29  |
| 31274     | 4-(CH <sub>2</sub> ) <sub>2</sub> OH                | 5                     | 80       | 16    |
| 31283     | 4-(CH <sub>2</sub> ) <sub>3</sub> NMe <sub>2</sub>  | 50                    | 60       | 1.2   |
| 31289     | 4-O(CH <sub>2</sub> ) <sub>2</sub> NMe <sub>2</sub> | 60                    | 75       | 1.25  |

The compounds were conveniently prepared using a Hantzsch thiazole synthesis (Scheme 1), where 4-pyridyl  $\alpha$ -bromoketones were condensed with variously substituted arylthioureas to give the compounds (manuscript in preparation). IC<sub>50</sub> was evaluated by XTT assay in RCC4 and RCC4/VHL cells. Ratio is the relative from the IC<sub>50</sub> in RCC4/VHL cells/IC<sub>50</sub> in RCC4 cells.

**Table S2. Yeast Screen in Response to STF-62247**

| <b>ORF</b> | <b>Gene</b> | <b>Human Homolog</b> | <b>Description</b>                                                                                                                                                                                                                              |
|------------|-------------|----------------------|-------------------------------------------------------------------------------------------------------------------------------------------------------------------------------------------------------------------------------------------------|
| YPL170W    | DAPI        | PGRMC1               | Heme-binding protein involved in regulation of cytochrome P450 protein Erg11p; damage response protein, related to mammalian membrane progesterone receptors; mutations lead to defects in telomeres, mitochondria, and sterol synthesis        |
| YHR073W    | OSH3        | OSBPL3               | Member of an oxysterol-binding protein family with seven members in <i>S. cerevisiae</i> ; family members have overlapping, redundant functions in sterol metabolism and collectively perform a function essential for viability                |
| YLR170C    | APS1        | LOC653653            | Small subunit of the clathrin-associated adaptor complex AP-1, which is involved in protein sorting at the trans-Golgi network; homolog of the sigma subunit of the mammalian clathrin AP-1 complex                                             |
| YAL026C    | DRS2        | ATP8A2               | Aminophospholipid translocase (flippase) that maintains membrane lipid asymmetry in post-Golgi secretory vesicles; localizes to the trans-Golgi network; contributes to clathrin-coated vesicle formation and endocytosis; type 4 P-type ATPase |
| YER031C    | YPT31       | RAB11A               | GTPase of the Ypt/Rab family, involved in the exocytic pathway; mediates intra-Golgi traffic or the budding of post-Golgi vesicles from the trans-Golgi                                                                                         |
| YPL227C    | ALG5        | ALG5p/ALG5           | UDP-glucose:dolichyl-phosphate glucosyltransferase, involved in asparagine-linked glycosylation in the endoplasmic reticulum                                                                                                                    |
| YGR063C    | SPT4        | SUPT4H1              | Protein that forms a complex with Spt5p and mediates both activation and inhibition of transcription elongation, and plays a role in pre-mRNA processing; in addition, Spt4p is involved in kinetochore function and gene silencing             |
| YMR077C    | VPS20       | CHMP6                | Myristoylated subunit of ESCRTIII, the endosomal sorting complex required for transport of transmembrane proteins into the multivesicular body pathway to the lysosomal/vacuolar lumen; cytoplasmic protein recruited to endosomal membranes    |
| YJR102C    | VPS25       | VPS25                | Component of the ESCRT-II complex, which is involved in ubiquitin-dependent sorting of proteins into the endosome                                                                                                                               |
| YNL298W    | CLA4        | PAK2                 | Cdc42p activated signal transducing kinase of the PAK (p21-activated kinase) family, involved in septin ring assembly and cytokinesis; directly phosphorylates septins Cdc3p and Cdc10p; other yeast PAK family members are Ste20p and Skm1p    |
| YNL325C    | Fig4        | KIAA0274             | Protein required for efficient mating, member of a family of eukaryotic proteins that contain a domain homologous to Sac1p                                                                                                                      |
| YBL078C    | ATG8        | LC3                  | Biological marker for autophagy                                                                                                                                                                                                                 |

Figure S1

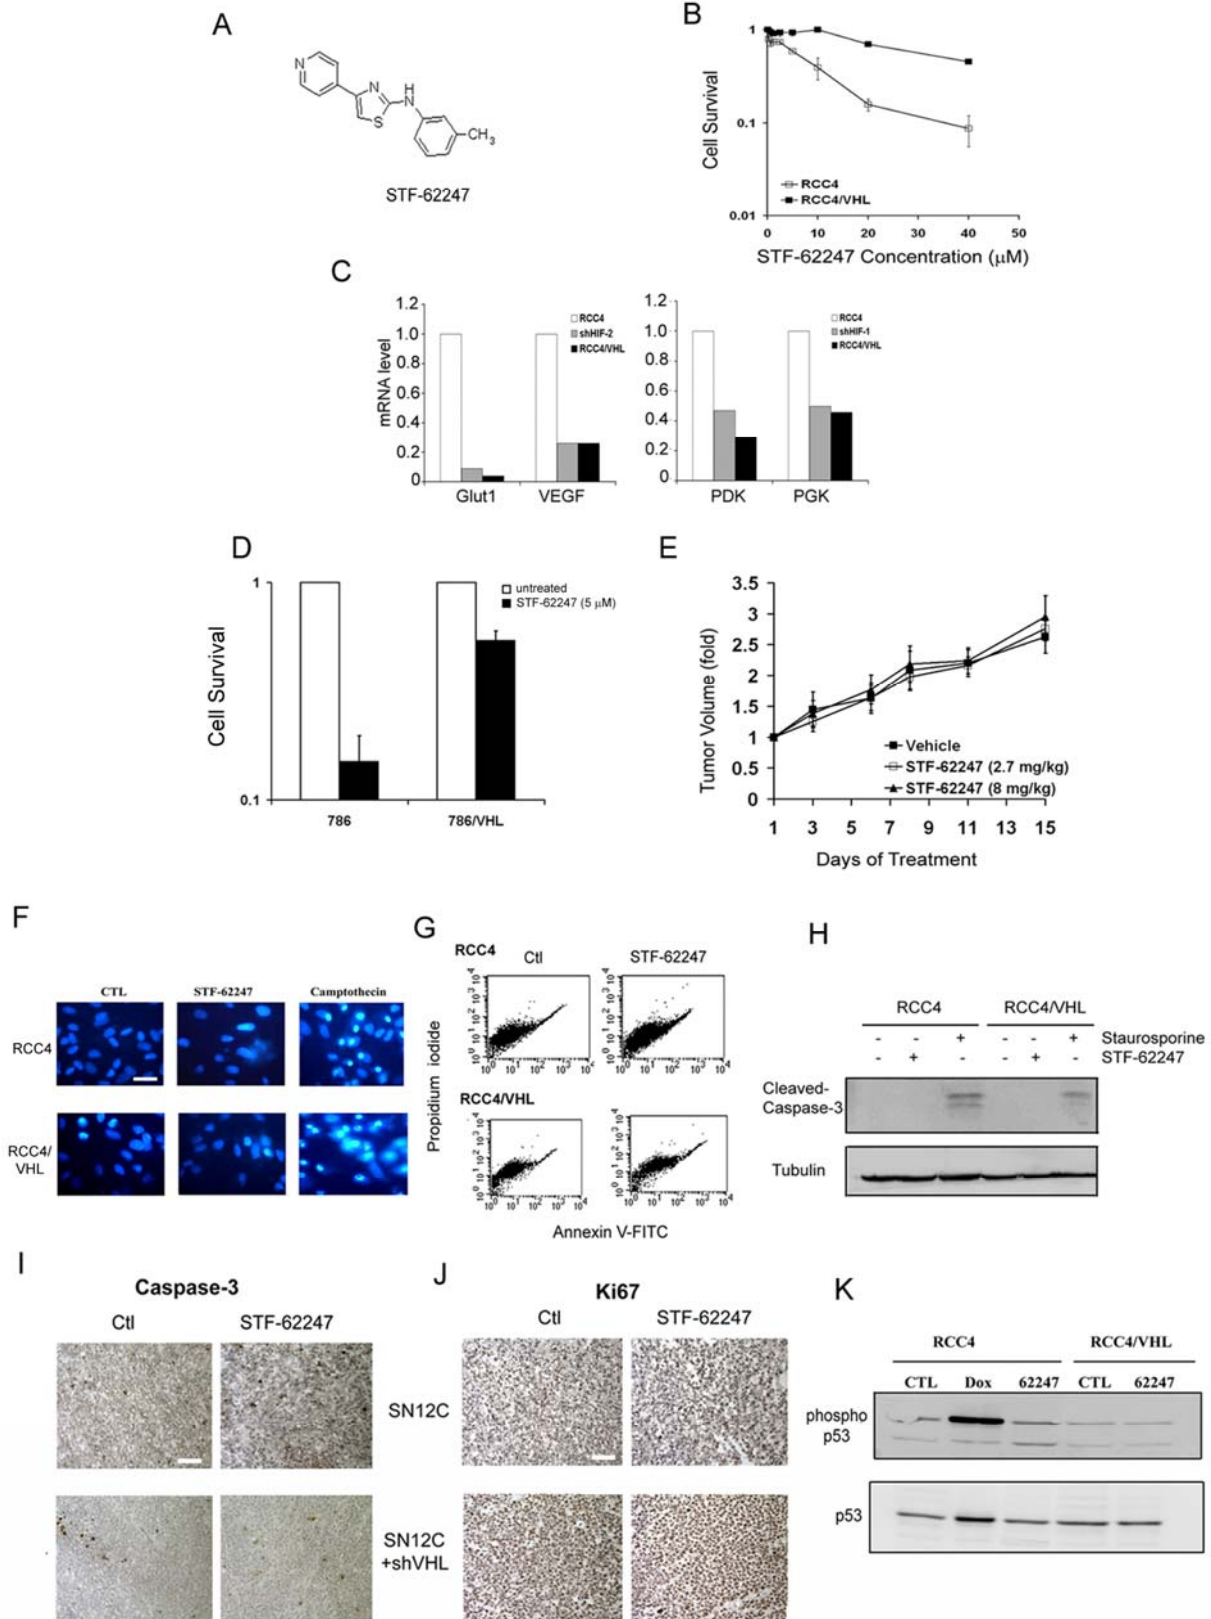

## Figure S1.

(A) Structure of STF-62247.

(B) XTT assay in RCC4 and RCC4/VHL in presence of STF-62247 (0-40  $\mu\text{M}$ ). Each point of the cell survival is calculated by the average of three different experiments in duplicate as the percent of treated versus untreated plate.

(C) qRT-PCR for Glut1, VEGF, PDF and PGK in RCC4 cells with or without HIF-1 $\alpha$ , HIF-2 $\alpha$  shRNA and in RCC4/VHL.

(D) In vitro clonogenic analysis of 786-O or 786/VHL treated with 5  $\mu\text{M}$  of STF-62247.

(E) SN12C ( $2-3 \times 10^6$  cells) were injected into SCID mice. Mice were injected daily by intraperitoneal injection with vehicle, 8 mg/kg or 2.7 mg/kg of STF-62247 in PBS. Tumor growth was measured every 2-3 days after the drug treatment was started.

(F) Hoechst staining in RCC4 and RCC4/VHL cells with 1.25  $\mu\text{M}$  of STF-62247 for 2 days. Camptothecin was used as positive control.

(G) FACS analysis for apoptosis after an annexin V-FITC staining in presence or absence of propidium iodine (PI) in cells after a treatment in same conditions than in C.

(H) Immunoblot for active caspase-3 in RCC4 and RCC4/VHL following treatment with 1.25  $\mu\text{M}$  of STF-62247 for 24 hours. Staurosporine was used as positive control (0.2  $\mu\text{M}$  for 24 hours).

(I and J) Immunostaining of caspase-3 and Ki67 respectively in SN12C and SN12C-VHL shRNA tumor samples untreated or treated with 30  $\mu\text{M}$  of STF-62247.

(K) Immunoblot for p53 and phospho-Ser15 p53 in RCC4 and RCC4/VHL cells after treatment with 1.25  $\mu\text{M}$  of STF-62247 or doxorubicin for 24 hours. All error bars represent the SEM. Scale bar, 10  $\mu\text{m}$ .

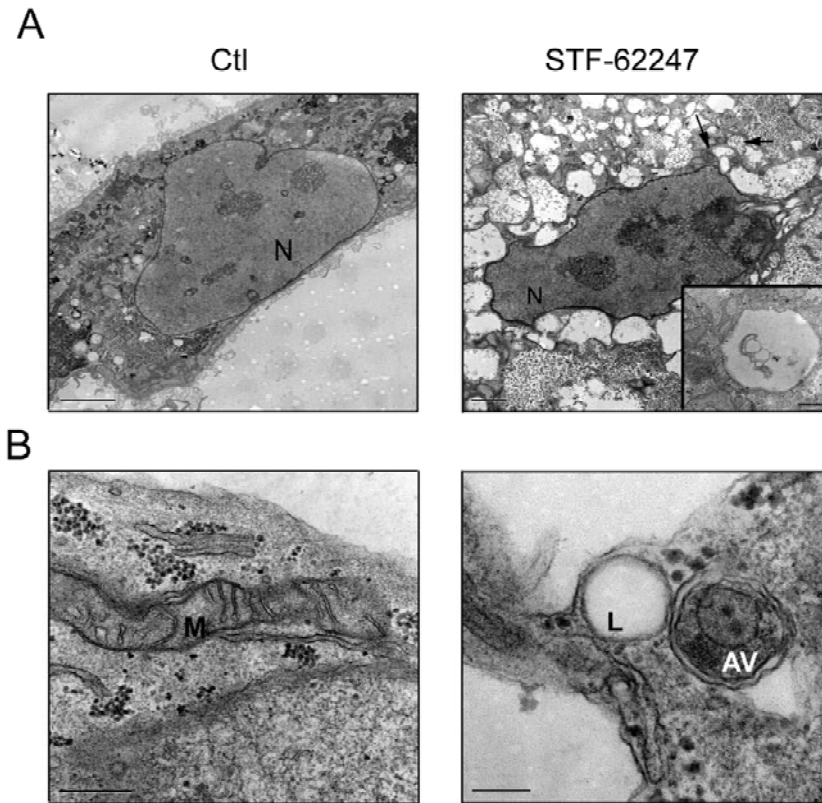

**Figure S2.**

(A) Transmission electron microscopy in RCC4 cells treated with vehicle control (DMSO) or with 1.25  $\mu\text{M}$  STF-62247 for 20 hrs. Arrows represent autophagic vacuoles during drug treatment. N. Nucleus. Scale bar on the left panel, 5  $\mu\text{m}$ . Scale bar on the right panel, 2  $\mu\text{m}$  and 0.5  $\mu\text{m}$  (insert).

(B) RCC4 cells treated with STF-62247 observed at higher magnification. M. Mitochondria L. Lysosome AV. Autophagic Vacuole. Scale bar on the left panel, 0.5  $\mu\text{m}$  and on the right panel, 0.2  $\mu\text{m}$ .

Figure S3

A

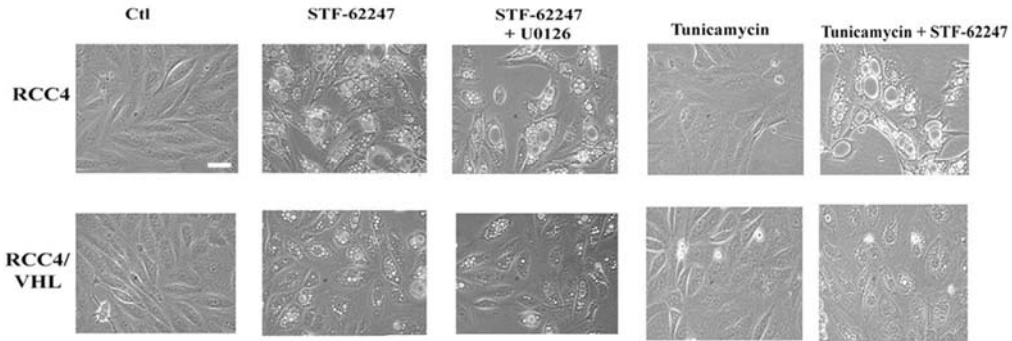

B

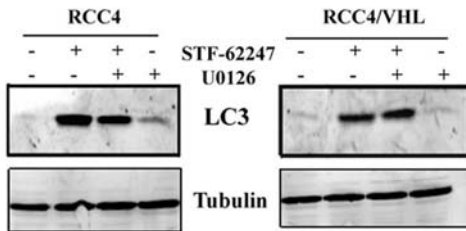

C

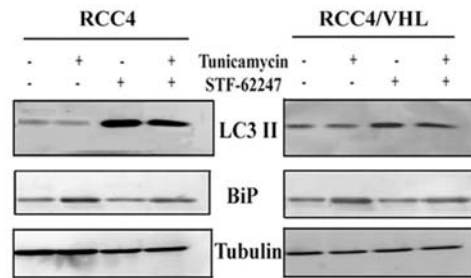

D

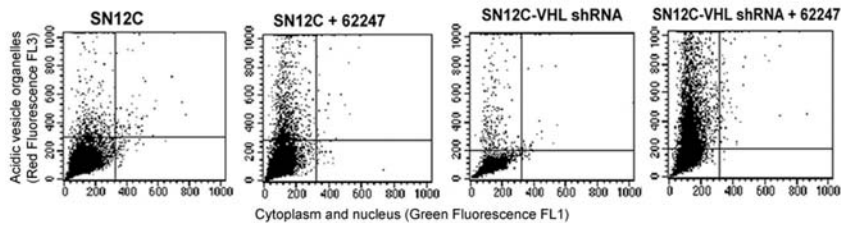

E

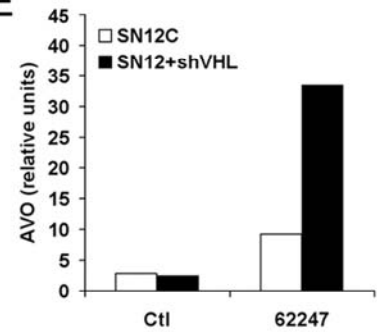

F

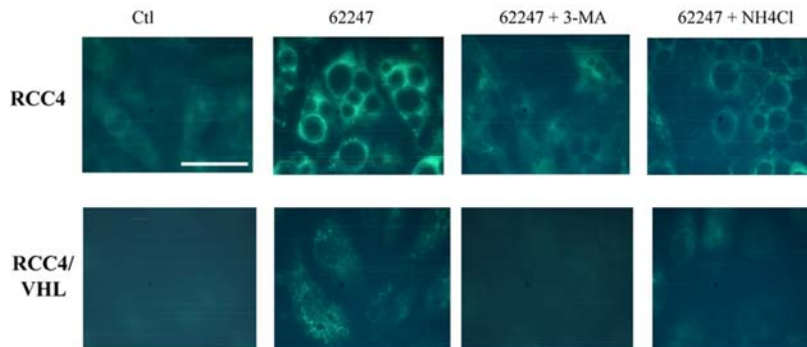

### Figure S3.

(A) VHL-deficient RCC4 and wild-type VHL were incubated in presence of 10  $\mu$ M U0126, or 2  $\mu$ g/ml tunicamycin with 1.25  $\mu$ M of STF-62247 for 20 hrs and the presence of vacuoles was examined under light microscopy.

(B and C) LC3 processing was evaluated by Western blot after the treatment with U0126 or tunicamycin in presence or absence of STF-62247 as described above. Tubulin was used as loading control.

(D) FACS analysis to measure the acidic vesicle organelles after staining with acridine orange in SN12C and SN12C-VHL shRNA following treatment with STF-62247 for 24 hours.

(E) AVO quantification from the FACS analysis in A.

(F) Autophagic vacuoles stained with MDC. After STF-62247 treatment with or without 3-MA,  $\text{NH}_4\text{Cl}$ , MDC was added the last 10 minutes. Then, cells were fixed, washed with PBS and observed directly under microscope. Scale bar, 10  $\mu$ m.

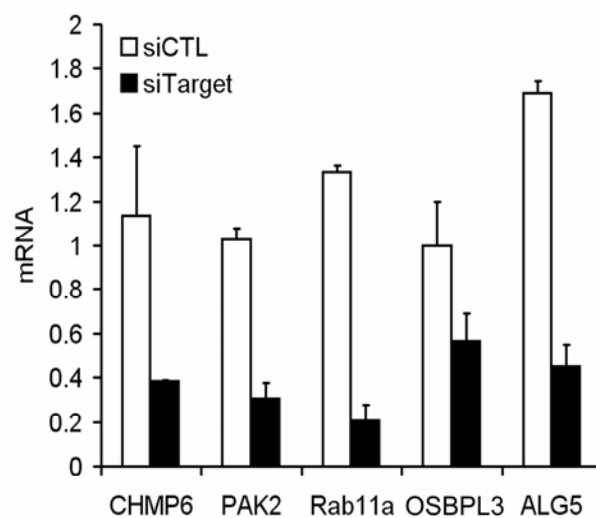

**Figure S4. qRT-PCR Analysis to Examine Knockdown of a Given Target Gene by siRNA Transfection**
